# Supplementary material
Source: publisher figshare collection journal article supplement (https://springernature.figshare.com/ndownloader/files/24016337)
Supplement: Supplementary file 1 [file 24016337]

SiteID	Country	Date of measurement	Site selection criteria	LON	LAT	Habitat type	# larva	# nymphs	# adult females	# adult males	# tick nymphs collected and used for screening
DK-000	DK	26-08-16	Original, 2016	10.2868	55.2224	Forest, low NDVI	9	18	0	0	600
DK-001	DK	19-08-16	Original, 2016	11.296	55.6443	Forest, low NDVI	142	121	2	6	600
DK-002	DK	08-09-16	Original, 2016	8.2191	55.7914	Forest, low NDVI	185	39	0	1	600
DK-005	DK	24-08-16	Original, 2016	9.1033	55.6536	Forest, low NDVI	0	8	1	2	600
DK-010	DK	07-09-16	Alternative, 2016	8.2032	55.7019	Forest, low NDVI	41	19	0	0	600
DK-025	DK	29-08-16	Alternative, 2016	11.5527	55.4186	Forest, low NDVI	403	120	2	1	600
DK-120	DK	17-08-16	Original, 2016	9.5573	54.9224	Forest, high NDVI	713	66	2	3	600
DK-121	DK	18-08-16	Original, 2016	11.5871	55.328	Forest, high NDVI	2305	201	0	0	580
DK-121	DK	16-08-17	Revisited, 2017	11.5871	55.328	Forest, high NDVI	560	114	0	3	NA
DK-122	DK	21-08-16	Original, 2016	9.9776	55.2238	Forest, high NDVI	50	41	1	2	600
DK-123	DK	23-09-16	Original, 2016	14.962	55.1096	Forest, high NDVI	683	258	1	4	600
DK-123	DK	23-08-17	Revisited, 2017	14.962	55.1096	Forest, high NDVI	525	150	5	4	NA
DK-124	DK	15-08-16	Original, 2016	11.5014	55.4391	Forest, high NDVI	854	71	0	0	600
DK-125	DK	12-09-16	Original, 2016	10.6526	55.238	Forest, high NDVI	204	36	0	0	600
DK-201	DK	05-09-16	Alternative, 2016	11.3153	54.9189	Forest, high NDVI	556	93	2	1	600
DK-237	DK	14-09-16	Alternative, 2016	11.8066	55.5106	Forest, high NDVI	586	80	0	2	600
DK-240	DK	31-08-16	Original, 2016	9.1588	55.5349	Meadow, low NDVI	2	8	0	1	600
DK-360	DK	23-08-16	Original, 2016	11.3078	54.8851	Meadow, high NDVI	5	1	0	0	0
DK-360	DK	15-08-17	Revisited, 2017	11.3078	54.8851	Meadow, high NDVI	0	4	0	0	NA
DK-361	DK	30-08-16	Original, 2016	11.8106	55.5625	Meadow, high NDVI	1	1	0	0	0
DK-361	DK	16-08-17	Revisited, 2017	11.8106	55.5625	Meadow, high NDVI	29	7	0	0	NA
DK-370	DK	05-09-16	Alternative, 2016	11.6821	54.7627	Meadow, high NDVI	7	0	0	0	0
DK-378	DK	05-09-16	Alternative, 2016	11.6167	54.7298	Meadow, high NDVI	2	1	0	0	0
DK-378	DK	15-08-17	Revisited, 2017	11.6167	54.7298	Meadow, high NDVI	9	0	0	0	NA
DK-383	DK	30-08-16	Alternative, 2016	11.9076	55.4561	Meadow, high NDVI	1	0	0	0	0
DK-453	DK	30-08-16	Alternative, 2016	11.8043	55.5522	Meadow, high NDVI	5	0	0	2	0
DK-482	DK	02-09-16	Original, 2016	9.7814	56.0961	Forest, low NDVI	25	26	0	0	570
DK-483	DK	17-09-16	Original, 2016	8.4183	56.9097	Forest, low NDVI	84	22	0	0	600
DK-484	DK	07-09-16	Original, 2016	8.1524	56.2849	Forest, low NDVI	796	95	4	1	600
DK-485	DK	01-09-16	Original, 2016	9.3554	55.9289	Forest, low NDVI	41	71	1	2	600
DK-521	DK	25-08-16	Alternative, 2016	10.676	56.2625	Forest, low NDVI	131	83	2	0	590
DK-554	DK	01-09-16	Alternative, 2016	9.6527	56.0445	Forest, low NDVI	51	37	0	0	600
DK-601	DK	25-08-16	Original, 2016	9.9884	56.106	Forest, high NDVI	107	72	0	0	600
DK-602	DK	16-08-16	Original, 2016	12.2264	56.0206	Forest, high NDVI	564	29	3	4	490
DK-604	DK	02-09-16	Original, 2016	9.2678	56.3032	Forest, high NDVI	328	215	3	6	600
DK-605	DK	24-08-16	Original, 2016	10.4117	56.4284	Forest, high NDVI	296	158	1	1	580
DK-605	DK	22-08-17	Revisited, 2017	10.4117	56.4284	Forest, high NDVI	221	88	1	2	NA
DK-616	DK	15-09-16	Alternative, 2016	9.3316	56.0774	Forest, high NDVI	299	12	0	0	600
DK-677	DK	17-08-16	Alternative, 2016	9.3881	56.9019	Forest, high NDVI	294	27	0	0	600
DK-721	DK	17-09-16	Original, 2016	8.7399	57.0922	Meadow, low NDVI	2	0	0	0	580
DK-757	DK	18-09-16	Alternative, 2016	9.4541	56.3826	Meadow, low NDVI	11	22	1	1	600
DK-819	DK	18-09-16	Alternative, 2016	9.4962	56.5879	Meadow, low NDVI	0	0	0	0	0
DK-840	DK	06-09-16	Original, 2016	8.4404	56.0279	Meadow, high NDVI	34	10	0	0	600
DK-901	DK	17-08-17	New, 2017	10.9235	55.1201	Forest, high NDVI	482	99	1	3	0
DK-902	DK	17-08-17	New, 2017	10.9195	55.1029	Meadow, high NDVI	115	16	0	0	0
DK-903	DK	21-08-17	New, 2017	10.2735	57.2042	Forest, high NDVI	0	16	1	0	0
DK-904	DK	21-08-17	New, 2017	10.2672	57.2105	Forest, high NDVI	54	22	0	0	0
NO-001	NO	01-09-16	Original, 2016	6.978	58.526	Forest, low NDVI	0	3	1	0	0
NO-003	NO	01-09-16	Original, 2016	6.946	58.523	Forest, low NDVI	0	0	0	0	0
NO-030	NO	15-09-16	Alternative, 2016	6.99	58.509	Forest, low NDVI	0	0	0	0	0
NO-046	NO	23-08-16	Alternative, 2016	8.465	58.591	Forest, low NDVI	0	1	1	0	0
NO-046	NO	22-08-17	Revisited, 2017	8.4662	58.5927	Forest, low NDVI	0	3	1	0	NA
NO-081	NO	05-09-16	Alternative, 2016	8.511	58.935	Forest, low NDVI	0	0	0	0	0
NO-090	NO	23-08-16	Alternative, 2016	9.098	58.645	Forest, low NDVI	249	38	1	4	0
NO-120	NO	08-09-16	Original, 2016	9.536	58.955	Forest, high NDVI	170	70	0	6	0
NO-122	NO	08-09-16	Original, 2016	10.113	59.288	Forest, high NDVI	71	41	0	3	0
NO-123	NO	29-08-16	Original, 2016	7.693	58.093	Forest, high NDVI	49	73	2	3	600
NO-124	NO	19-08-16	Original, 2016	8.924	58.605	Forest, high NDVI	346	32	2	3	600
NO-158	NO	19-08-16	Alternative, 2016	8.846	58.659	Forest, high NDVI	16	16	1	6	0
NO-176	NO	31-08-16	Alternative, 2016	6.982	58.338	Forest, high NDVI	0	4	0	4	0
NO-178	NO	31-08-16	Alternative, 2016	6.651	58.246	Forest, high NDVI	480	46	2	0	0
NO-17A	NO	18-09-17	New, 2017	7.6114	58.1584	Forest, high NDVI	0	5	1	0	0
NO-17B	NO	09-09-17	New, 2017	7.4283	58.2284	Forest, high NDVI	0	4	0	0	0
NO-17C	NO	09-09-17	New, 2017	7.7463	58.1427	Forest, high NDVI	0	16	0	2	0
NO-360	NO	17-09-16	Original, 2016	5.966	58.7	Meadow, high NDVI	0	0	0	0	0
NO-480	NO	31-08-16	Original, 2016	9.8287	59.8696	Forest, low NDVI	0	2	0	0	0
NO-481	NO	24-08-16	Original, 2016	11.7654	59.7886	Forest, low NDVI	0	1	0	0	0
NO-481	NO	30-08-17	Revisited, 2017	11.7654	59.7886	Forest, low NDVI	0	0	0	0	NA
NO-485	NO	03-09-16	Original, 2016	10.9557	60.0992	Forest, low NDVI	0	0	0	0	0
NO-528	NO	14-09-16	Alternative, 2016	9.023	59.41	Forest, low NDVI	0	2	1	1	0
NO-602	NO	24-08-16	Original, 2016	10.975	59.6414	Forest, high NDVI	0	1	0	0	0
NO-602	NO	30-08-17	Revisited, 2017	10.974	59.6409	Forest, high NDVI	0	0	0	0	NA
NO-658	NO	13-09-16	Alternative, 2016	9.563	59.82	Forest, low NDVI	0	0	0	0	0
NO-713	NO	13-09-16	Alternative, 2016	8.965	59.618	Forest, high NDVI	7	3	0	0	0
NO-721	NO	15-09-16	Original, 2016	11.6456	59.3603	Meadow, low NDVI	0	0	2	3	0
NO-794	NO	13-09-16	Alternative, 2016	9.1	59.325	Meadow, low NDVI	0	8	0	0	0
NO-840	NO	26-09-16	Original, 2016	10.285	59.3635	Meadow, low NDVI	0	0	0	0	0
NO-921	NO	26-09-16	Alternative, 2016	10.152	59.4342	Meadow, high NDVI	0	0	1	1	0
NO-X1	NO	19-09-17	New, 2017	10.5889	59.6639	Forest, high NDVI	20	53	0	4	0
O-035	NO	27-09-16	Alternative, Oslo Fjord, 2016	10.3948	59.161	Forest, low NDVI	13	91	3	2	600
O-035	NO	01-09-17	Revisited, Oslo Fjord, 2017	10.3948	59.161	Forest, low NDVI	94	118	11	4	NA
O-074	NO	22-09-16	Alternative, Oslo Fjord, 2016	10.3074	59.0918	Forest, low NDVI	386	87	11	8	600
O-078	NO	22-08-16	Original, Oslo Fjord, 2016	11.0053	59.0852	Forest, low NDVI	428	45	5	3	600
O-089	NO	17-08-16	Original, Oslo Fjord, 2016	10.2708	59.0542	Forest, low NDVI	411	27	0	1	0
O-103	NO	18-08-16	Original, Oslo Fjord, 2016	10.7625	59.2458	Forest,high NDVI	0	4	0	0	0
O-104	NO	18-08-16	Alternative, Oslo Fjord, 2016	10.781	59.2497	Forest,high NDVI	287	30	0	2	0
O-107	NO	14-09-16	Original, Oslo Fjord, 2016	10.3708	59.2042	Forest, high NDVI	319	27	2	6	0
O-111	NO	20-09-16	Original, Oslo Fjord, 2016	11.0958	59.1875	Forest, high NDVI	367	80	5	3	600
O-119	NO	06-09-16	Original, Oslo Fjord, 2016	10.3625	59.1458	Forest, high NDVI	843	87	4	3	600
O-119	NO	01-09-17	Revisited, Oslo Fjord, 2017	10.3625	59.1458	Forest, high NDVI	74	70	0	7	NA
O-168	NO	20-09-16	Original, Oslo Fjord, 2016	10.9625	59.0458	Meadow, low NDVI	5	22	0	3	0
O-188	NO	06-09-16	Alternative, Oslo Fjord, 2016	10.3625	59.1458	Meadow, high NDVI	14	9	0	0	0
O-223	NO	19-09-16	Alternative, Oslo Fjord, 2016	10.4042	59.6292	Forest, low NDVI	191	15	3	1	0
O-234	NO	05-09-16	Original, Oslo Fjord, 2016	10.2542	59.5375	Forest, low NDVI	0	2	7	3	0
O-238	NO	08-09-16	Original, Oslo Fjord, 2016	10.5145	59.5321	Forest, low NDVI	36	87	7	3	600
O-250	NO	14-09-16	Alternative, Oslo Fjord, 2016	10.4708	59.3792	Forest, low NDVI	166	27	1	1	0
O-263	NO	15-09-16	Original, Oslo Fjord, 2016	10.7139	59.7346	Forest, high NDVI	54	35	4	2	0
O-281	NO	05-09-16	Original, Oslo Fjord, 2016	10.2708	59.5292	Forest, high NDVI	2	19	1	1	0
O-285	NO	05-09-16	Original, Oslo Fjord, 2016	10.2792	59.5208	Forest, high NDVI	0	10	1	0	0
O-295	NO	27-09-16	Alternative, Oslo Fjord, 2016	10.393	59.4376	Forest, high NDVI	3	89	7	9	600
O-296	NO	13-09-16	Original, Oslo Fjord, 2016	10.6042	59.4208	Forest, high NDVI	505	180	5	12	600
O-296	NO	24-08-17	Revisited, Oslo Fjord, 2017	10.6042	59.4208	Forest, high NDVI	337	168	2	3	NA
O-309	NO	05-09-16	Original, Oslo Fjord, 2016	10.2653	59.5668	Meadow, low NDVI	1	1	0	0	0
O-321	NO	05-09-16	Original, Oslo Fjord, 2016	10.4292	59.4375	Meadow, high NDVI	8	13	0	0	600
SE-000	SE	13-09-16	Original, 2016	14.8302	56.7929	Forest, Low NDVI	0	17	0	2	0
SE-001	SE	07-09-16	Original, 2016	13.3136	56.7154	Forest, Low NDVI	0	6	1	0	0
SE-002	SE	02-09-16	Original, 2016	14.9645	57.207	Forest, Low NDVI	0	5	0	1	0
SE-003	SE	01-09-16	Original, 2016	14.9682	57.5822	Forest, Low NDVI	4	21	2	1	0
SE-004	SE	10-09-16	Original, 2016	13.88	56.5033	Meadow, Low NDVI	0	28	0	0	590
SE-005	SE	13-09-16	Original, 2016	14.4357	56.4483	Forest, Low NDVI	0	12	0	0	600
SE-009	SE	13-09-16	Alternative, 2016	14.516	56.6177	Forest, Low NDVI	0	15	1	0	0
SE-011	SE	13-09-16	Alternative, 2016	14.2619	56.4342	Forest, Low NDVI	0	23	0	0	600
SE-026	SE	14-09-16	Alternative, 2016	14.8678	56.8478	Forest, Low NDVI	1	5	0	0	0
SE-038	SE	02-09-16	Alternative, 2016	14.8709	57.2961	Forest, Low NDVI	0	11	0	0	0
SE-040	SE	01-09-16	Alternative, 2016	14.8	57.5036	Forest, Low NDVI	12	11	0	0	0
SE-047	SE	07-09-16	Alternative, 2016	13.3479	56.9858	Forest, Low NDVI	0	16	0	1	0
SE-064	SE	02-09-16	Alternative, 2016	14.9889	57.2011	Forest, Low NDVI	0	36	1	1	590
SE-076	SE	01-09-16	Alternative, 2016	15.1732	57.8013	Forest, Low NDVI	61	31	0	0	0
SE-088	SE	14-09-16	Alternative, 2016	14.8781	57.0041	Forest, Low NDVI	0	9	1	0	0
SE-117	SE	10-09-16	Alternative, 2016	13.8745	56.5627	Forest, Low NDVI	0	51	6	2	440
SE-117	SE	15-08-17	Revisited, 2017	13.8745	56.5627	Forest, Low NDVI	6	66	0	1	NA
SE-120	SE	01-09-16	Original, 2016	14.5101	57.2348	Forest, High NDVI	0	8	1	0	0
SE-121	SE	06-09-16	Original, 2016	12.863	56.746	Forest, High NDVI	0	12	0	0	0
SE-122	SE	15-09-16	Original, 2016	15.6052	56.7206	Forest, high NDVI	0	18	0	0	600
SE-123	SE	31-08-16	Original, 2016	13.0383	57.4214	Forest, high NDVI	9	19	0	1	0
SE-124	SE	30-08-16	Original, 2016	16.4307	58.6692	Forest, High NDVI	179	46	1	4	0
SE-125	SE	30-08-16	Original, 2016	13.2846	58.2504	Forest, High NDVI	1	77	2	0	600
SE-125	SE	15-08-17	Revisited, 2017	13.2846	58.2503	Forest, High NDVI	5	112	0	1	NA
SE-135	SE	01-09-16	Alternative, 2016	14.7685	57.0906	Forest, high NDVI	1	19	0	0	0
SE-140	SE	01-09-16	Alternative, 2016	14.7936	57.4321	Forest, High NDVI	0	13	0	0	0
SE-205	SE	31-08-16	Alternative, 2016	13.2482	57.4624	Forest, High NDVI	6	22	0	2	0
SE-211	SE	31-08-16	Alternative, 2016	13.1218	57.6073	Forest, high NDVI	2	13	1	0	0
SE-219	SE	06-09-16	Alternative, 2016	12.8238	56.7431	Forest, High NDVI	0	47	2	2	590
SE-221	SE	15-09-16	Alternative, 2016	15.641	56.4541	Forest, Low NDVI	0	58	1	1	440
SE-221	SE	18-08-17	Revisited, 2017	15.641	56.4541	Forest, Low NDVI	1	26	3	0	NA
SE-240	SE	15-08-16	Original, 2016	15.8689	57.7928	Meadow, Low NDVI	14	10	0	1	0
SE-282	SE	31-08-16	Alternative, 2016	15.9558	58.1361	Meadow, Low NDVI	0	1	0	0	0
SE-282	SE	19-08-17	Revisited, 2017	15.9558	58.1361	Meadow, Low NDVI	16	9	0	0	NA
SE-360	SE	24-08-16	Original, 2016	12.0486	58.7563	Meadow, High NDVI	1	11	0	0	0
SE-361	SE	09-09-16	Original, 2016	12.9232	56.3671	Meadow, High NDVI	0	8	0	1	0
SE-431	SE	09-09-16	Alternative, 2016	13.0354	55.9685	Meadow, High NDVI	0	11	0	1	0
SE-469	SE	09-09-16	Alternative, 2016	13.2285	56.1342	Meadow, High NDVI	0	11	0	0	0
SE-480	SE	20-08-16	Original, 2016	15.9365	60.7958	Forest, Low NDVI	0	0	0	0	0
SE-481	SE	26-08-16	Original, 2016	11.1459	58.9879	Forest, Low NDVI	50	46	1	0	0
SE-482	SE	23-08-16	Original, 2016	11.9745	59	Forest, Low NDVI	0	4	1	0	0
SE-483	SE	22-08-16	Original, 2016	12.3658	59.5123	Forest, Low NDVI	0	0	0	1	0
SE-484	SE	15-08-16	Original, 2016	19.4792	63.9298	Forest, Low NDVI	0	0	0	0	0
SE-485	SE	24-08-16	Original, 2016	16.1594	60.129	Forest, Low NDVI	0	7	1	0	0
SE-487	SE	20-08-16	Alternative, 2016	16.005	60.8231	Forest, Low NDVI	0	0	0	0	0
SE-488	SE	23-08-16	Alternative, 2016	12.0866	59.5392	Forest, Low NDVI	0	0	0	0	0
SE-496	SE	23-08-16	Alternative, 2016	12.5	59.3767	Forest, Low NDVI	0	0	0	0	0
SE-497	SE	24-08-16	Alternative, 2016	16.1323	59.8344	Forest, Low NDVI	0	1	2	0	0
SE-497	SE	21-08-17	Revisited, 2017	16.1323	59.8344	Forest, Low NDVI	0	18	1	2	NA
SE-500	SE	15-08-16	Alternative, 2016	19.3931	63.9341	Forest, Low NDVI	0	0	0	0	0
SE-511	SE	27-08-16	Alternative, 2016	12.2598	59.2489	Forest, Low NDVI	18	16	0	0	0
SE-517	SE	24-08-16	Alternative, 2016	12.1295	59.1192	Forest, Low NDVI	0	2	0	0	0
SE-534	SE	24-08-16	Alternative, 2016	16.399	60.0072	Forest, Low NDVI	0	4	3	0	0
SE-542	SE	24-08-16	Alternative, 2016	12.1376	59.1126	Forest, Low NDVI	0	7	1	1	0
SE-549	SE	27-08-16	Alternative, 2016	11.9	59.1379	Forest, Low NDVI	18	21	0	4	0
SE-562	SE	15-08-16	Alternative, 2016	19.6446	63.9167	Forest, Low NDVI	0	0	0	0	0
SE-600	SE	18-08-16	Original, 2016	17.2843	62.2004	Forest, High NDVI	0	0	0	0	0
SE-601	SE	31-08-16	Original, 2016	17.6041	60.6253	Forest, High NDVI	44	16	1	3	0
SE-602	SE	20-08-16	Original, 2016	16.807	60.8833	Forest, High NDVI	0	1	0	0	0
SE-602	SE	21-08-17	Revisited, 2017	16.807	60.8833	Forest, High NDVI	5	3	0	0	NA
SE-603	SE	16-08-16	Original, 2016	16.1531	59.0024	Forest, High NDVI	0	16	3	3	0
SE-604	SE	15-08-16	Original, 2016	19.9048	63.9004	Forest, High NDVI	0	0	0	0	0
SE-605	SE	08-09-16	Original, 2016	18.6958	60.0461	Forest, High NDVI	134	23	0	0	0
SE-611	SE	15-08-16	Alternative, 2016	19.9154	63.7319	Forest, High NDVI	0	0	0	0	0
SE-621	SE	23-08-16	Alternative, 2016	16.4766	59.0391	Forest, High NDVI	0	10	1	0	0
SE-635	SE	15-08-16	Alternative, 2016	17.5116	60.5462	Forest, High NDVI	40	10	1	1	0
SE-637	SE	18-08-16	Alternative, 2016	17.3344	62.2204	Forest, High NDVI	0	0	0	0	0
SE-644	SE	15-08-16	Alternative, 2016	19.7082	63.7718	Forest, High NDVI	0	0	0	0	0
SE-649	SE	20-08-16	Alternative, 2016	16.8149	60.8668	Forest, High NDVI	0	0	1	1	0
SE-666	SE	18-08-16	Alternative, 2016	17.2592	62.2629	Forest, High NDVI	0	0	0	0	0
SE-695	SE	23-08-16	Alternative, 2016	15.9357	59.0107	Forest, High NDVI	0	8	0	0	0
SE-719	SE	20-08-16	Alternative, 2016	16.712	61.1019	Forest, High NDVI	0	3	1	1	0
SE-720	SE	22-08-16	Original, 2016	14.6731	59.4195	Meadow, Low NDVI	0	0	1	0	0
SE-721	SE	16-08-16	Original, 2016	17.8436	60.1669	Meadow, Low NDVI	75	5	0	1	0
SE-744	SE	16-08-16	Alternative, 2016	17.9333	60.1714	Meadow, Low NDVI	5	16	2	4	0
SE-763	SE	16-08-16	Alternative, 2016	18.0686	60.1622	Meadow, Low NDVI	1	6	3	3	0
SE-806	SE	22-08-16	Alternative, 2016	14.6581	59.3859	Meadow, Low NDVI	0	0	0	0	0
SE-831	SE	22-08-16	Alternative, 2016	14.7888	59.5391	Meadow, Low NDVI	0	0	0	0	0
SE-840	SE	09-09-16	Original, 2016	18.4831	59.9167	Meadow, High NDVI	0	0	1	2	0
SE-858	SE	09-09-16	Alternative, 2016	18.6051	59.9517	Meadow, High NDVI	43	22	1	2	0
SE-883	SE	09-09-16	Alternative, 2016	18.5485	59.9258	Meadow, High NDVI	0	0	0	0	0
SE-X1	SE	14-08-17	New, 2017	15.454	59.7275	Forest, low NDVI	8	5	0	1	0
SE-X2	SE	23-08-17	New, 2017	15.013	59.0118	Forest, low NDVI	0	3	0	0	0
SE-X3	SE	17-08-17	New, 2017	13.5563	56.2261	Forest, high NDVI	26	64	0	2	0
SE-X4	SE	20-08-17	New, 2017	18.1672	59.4167	Forest, high NDVI	48	69	1	4	0
